# Supplementary material for: Machine Learning for Risk Prediction of Oesophago-Gastric Cancer in Primary Care: Comparison with Existing Risk-Assessment Tools
Source: MDPI journal article supplement (doi:10.3390/cancers14205023), 2022-10-14
Supplement: s1 [file s1]

# Machine Learning for Risk Prediction of Oesophago-Gastric Cancer in Primary Care: Comparison with Existing Risk-Assessment Tools

Emma Briggs, Marc de Kamps, Willie Hamilton, Owen Johnson, Ciarán D. McInerney, Richard D. Neal

**Table S1.** Feature variables. N.B.: Where a binary value has been used for symptoms and lab test results, 0 indicates normal and 1 indicates abnormal.

| Category         | Variable Name              | Definition                                 | Variable Type                              | ICPC code                    | Range     |
|------------------|----------------------------|--------------------------------------------|--------------------------------------------|------------------------------|-----------|
| Demographics     | 'age_group'                | Age group                                  | Binary<br>(0: under 55,<br>1: 55 and over) | none                         | {0,1}     |
|                  | 'chol_sq'                  | Serum cholesterol (given as squared value) | Float                                      | T34006                       | [23, 182] |
| Lab test results | 'abn_low_MCV'              | Abnormally low MCV                         | Binary                                     | A34011<br>(Full blood count) | {0, 1}    |
|                  | 'abn_low_haem'             | Abnormally low haemoglobin                 | Binary                                     | B34018                       | {0, 1}    |
|                  | 'abn_hi_plat'              | Abnormally high platelet count             | Binary                                     | B34005                       | {0, 1}    |
|                  | 'abn_hi_LFT'               | Abnormally high liver function test        | Binary                                     | D34008                       | {0, 1}    |
|                  | 'abn_hi_IM'                | Abnormally high inflammatory markers       | Binary                                     | B33007                       | {0, 1}    |
|                  | 'abn_hi_wcc'               | Abnormally high white cell count           | Binary                                     | A34011 (Full blood count)    | {0, 1}    |
| Symptoms         | 'sym_d12_constipation1'    | Constipation, first presentation           | Binary                                     | D12                          | {0, 1}    |
|                  | 'sym_a11_chest_pain1'      | Chest pain, first presentation             | Binary                                     | A11                          | {0, 1}    |
|                  | 'sym_d01_abdo_pain1'       | Abdominal pain, first presentation         | Binary                                     | D01                          | {0, 1}    |
|                  | 'sym_t08_weightloss1'      | Weight loss, first presentation            | Binary                                     | T08                          | {0, 1}    |
|                  | 'sym_d21_dysphagia1'       | Dysphagia, first presentation              | Binary                                     | D21                          | {0, 1}    |
|                  | 'sym_d21_dysphagia2'       | Dysphagia, second presentation             | Binary                                     | D21                          | {0, 1}    |
|                  | 'sym_d84_reflux1'          | Reflux, first presentation                 | Binary                                     | D84                          | {0, 1}    |
|                  | 'sym_d02_epigastric_pain1' | Epigastric pain, first presentation        | Binary                                     | D02                          | {0, 1}    |
|                  | 'sym_d07_dyspepsia1'       | Dyspepsia, first presentation              | Binary                                     | D07                          | {0, 1}    |

|                            |                                      |        |     |        |
|----------------------------|--------------------------------------|--------|-----|--------|
| 'sym_d07_dyspepsia2'       | Dyspepsia, second presentation       | Binary | D07 | {0, 1} |
| 'sym_d10_nausea_vomiting1' | Nausea/Vomiting, first presentation  | Binary | D10 | {0, 1} |
| 'sym_d10_nausea_vomiting2' | Nausea/Vomiting, second presentation | Binary | D10 | {0, 1} |

**Table S2.** Hyperparameter tuning strategy. Includes list of hyperparameters searched during grid-search cross-validation for fine-tuning models and the corresponding results of each search. 5-fold cross-validation was used for all models. The scoring metric used to select optimal values was mean accuracy.

| Model                  | Hyperparameter    | Values searched                      | Outcome   |
|------------------------|-------------------|--------------------------------------|-----------|
| Random Forest          | random_grid       | {True}                               | True      |
|                        | max_depth         | {25, 50, 75, None}                   | 75        |
|                        | max_features      | {'auto', 'sqrt'}                     | 'auto'    |
|                        | min_samples_leaf  | {2, 4}                               | 4         |
|                        | min_samples_split | {2, 5, 10}                           | 5         |
|                        | criterion         | {'entropy'}                          | 'entropy' |
|                        | n_estimators      | {100, 150, 200, 250, 500}            | 250       |
| Support Vector Machine | C                 | {0.1, 1, 10, 100}                    | 0.1       |
|                        | gamma             | {0.001, 0.01, 0.1, 1}                | 1         |
|                        | kernel            | {'rbf', 'sigmoid', 'poly', 'linear'} | 'rbf'     |
| Extreme                | min_child_weight  | {1, 5, 10}                           | 10        |
| Gradient               | gamma             | {0.5, 1, 2, 5}                       | 5         |
| Boosted                | subsample         | {0.5, 0.8, 1.0}                      | 0.8       |
| Decision               | colsample_bytree  | {0.5, 0.8, 1.0}                      | 0.5       |
| Trees                  | max_depth         | {3, 4, 5}                            | 4         |
| Logistic Regression    | solver            | {'lbfgs', 'liblinear', 'sag'}        | 'sag'     |
|                        | C                 | {0.01, 0.1, 1, 10, 100, 1000}        | 0.1       |

**Table S3.** Performance for all machine learning based probabilistic classifiers, across a range of thresholds, in comparison with oesophago-gastric cancer risk assessment tool (ogRAT) for prediction of oesophago-gastric cancer incidence, on test dataset. For machine learning models, the classification threshold range is given between 0.3 and 0.8 (in increments of 0.1) to represent best performance and a trade-off between precision and recall which is comparable to that of the ogRAT. ogRAT performance is displayed at the 0.01, 0.02, and 0.03 risk thresholds which are the risk thresholds realistically considered in practice when using the ogRAT.

| Classifier                             | AUROC | Classification threshold | Accuracy | Precision | Recall | F1    |
|----------------------------------------|-------|--------------------------|----------|-----------|--------|-------|
| Support Vector Machine (Linear kernel) | 0.869 | 0.3                      | 0.892    | 0.760     | 0.631  | 0.690 |
|                                        |       | 0.4                      | 0.894    | 0.827     | 0.560  | 0.668 |
|                                        |       | 0.5                      | 0.892    | 0.850     | 0.525  | 0.649 |
|                                        |       | 0.6                      | 0.887    | 0.878     | 0.475  | 0.616 |
|                                        |       | 0.7                      | 0.880    | 0.887     | 0.426  | 0.576 |

|                                                                  |       |       |       |       |       |       |
|------------------------------------------------------------------|-------|-------|-------|-------|-------|-------|
|                                                                  |       | 0.8   | 0.880 | 0.903 | 0.413 | 0.567 |
| <b>Support Vector Machine<br/>(Radial Basis Function kernel)</b> | 0.800 | 0.3   | 0.890 | 0.753 | 0.625 | 0.683 |
|                                                                  |       | 0.4   | 0.893 | 0.789 | 0.599 | 0.681 |
|                                                                  |       | 0.5   | 0.894 | 0.814 | 0.579 | 0.676 |
|                                                                  |       | 0.6   | 0.894 | 0.836 | 0.551 | 0.664 |
|                                                                  |       | 0.7   | 0.890 | 0.850 | 0.513 | 0.640 |
|                                                                  |       | 0.8   | 0.886 | 0.870 | 0.457 | 0.599 |
| <b>Logistic Regression</b>                                       | 0.869 | 0.3   | 0.889 | 0.741 | 0.641 | 0.688 |
|                                                                  |       | 0.4   | 0.894 | 0.810 | 0.579 | 0.675 |
|                                                                  |       | 0.5   | 0.892 | 0.845 | 0.533 | 0.654 |
|                                                                  |       | 0.6   | 0.887 | 0.870 | 0.478 | 0.617 |
|                                                                  |       | 0.7   | 0.881 | 0.885 | 0.435 | 0.584 |
|                                                                  |       | 0.8   | 0.880 | 0.896 | 0.418 | 0.570 |
| <b>Random Forest</b>                                             | 0.861 | 0.3   | 0.880 | 0.681 | 0.690 | 0.684 |
|                                                                  |       | 0.4   | 0.891 | 0.757 | 0.634 | 0.690 |
|                                                                  |       | 0.5   | 0.893 | 0.819 | 0.563 | 0.667 |
|                                                                  |       | 0.6   | 0.886 | 0.859 | 0.482 | 0.618 |
|                                                                  |       | 0.7   | 0.876 | 0.915 | 0.389 | 0.546 |
|                                                                  |       | 0.8   | 0.874 | 0.917 | 0.360 | 0.516 |
| <b>Bernoulli Naïve Bayes</b>                                     | 0.861 | 0.3   | 0.877 | 0.672 | 0.658 | 0.665 |
|                                                                  |       | 0.4   | 0.884 | 0.705 | 0.640 | 0.671 |
|                                                                  |       | 0.5   | 0.889 | 0.747 | 0.610 | 0.671 |
|                                                                  |       | 0.6   | 0.892 | 0.775 | 0.587 | 0.668 |
|                                                                  |       | 0.7   | 0.891 | 0.796 | 0.550 | 0.650 |
|                                                                  |       | 0.8   | 0.874 | 0.811 | 0.427 | 0.559 |
| <b>eXtreme Gradient Boosted<br/>Decision Trees (‘XGBoost’)</b>   | 0.866 | 0.3   | 0.886 | 0.718 | 0.664 | 0.690 |
|                                                                  |       | 0.4   | 0.892 | 0.795 | 0.585 | 0.674 |
|                                                                  |       | 0.5   | 0.893 | 0.846 | 0.538 | 0.657 |
|                                                                  |       | 0.6   | 0.886 | 0.875 | 0.473 | 0.614 |
|                                                                  |       | 0.7   | 0.880 | 0.899 | 0.420 | 0.572 |
|                                                                  |       | 0.8   | 0.879 | 0.911 | 0.392 | 0.548 |
| <b>Oesophago-gastric<br/>Risk-Assessment Tool (ogRAT)</b>        | 0.813 | 0.010 | 0.873 | 0.861 | 0.414 | 0.559 |
|                                                                  |       | 0.020 | 0.869 | 0.909 | 0.334 | 0.489 |
|                                                                  |       | 0.030 | 0.866 | 0.911 | 0.313 | 0.466 |

### Feature Contribution Graphs

Below are a series of graphs representing a rough estimation of the ‘feature importance’ for each model, i.e., an estimation of the relative contribution of each feature to the model risk score.

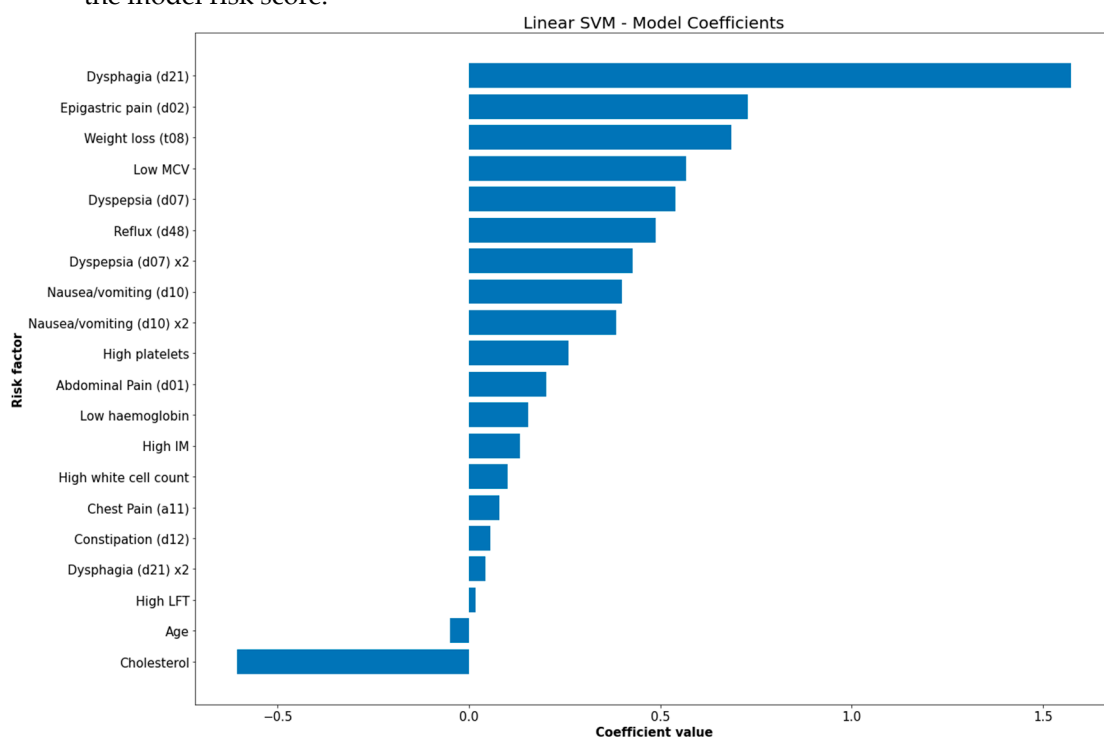

**Figure S1.** Feature contribution estimation for Support Vector Machine (Linear kernel). Feature contribution values approximated using model coefficients.

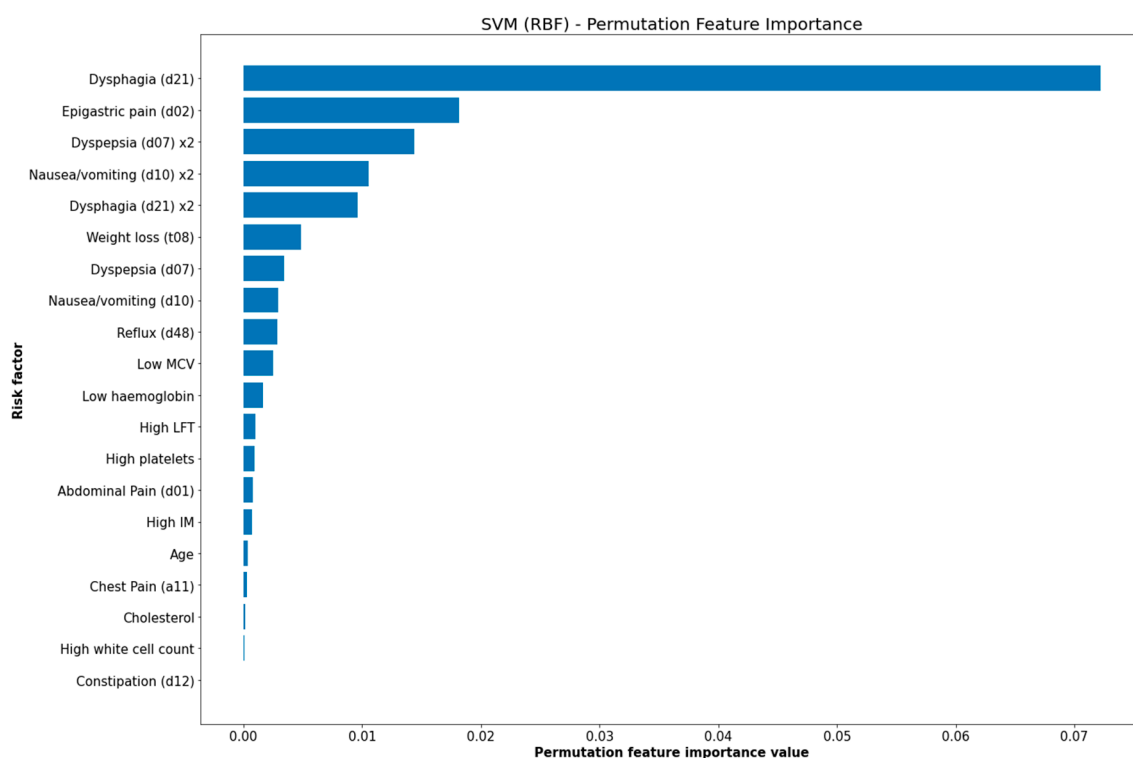

**Figure S2.** Feature contribution estimation for Support Vector Machine (Radial Basis Function kernel). Feature contribution values approximated using permutation feature importance (i.e., the

mean relative decrease in the model accuracy score when a single feature value is randomly shuffled).

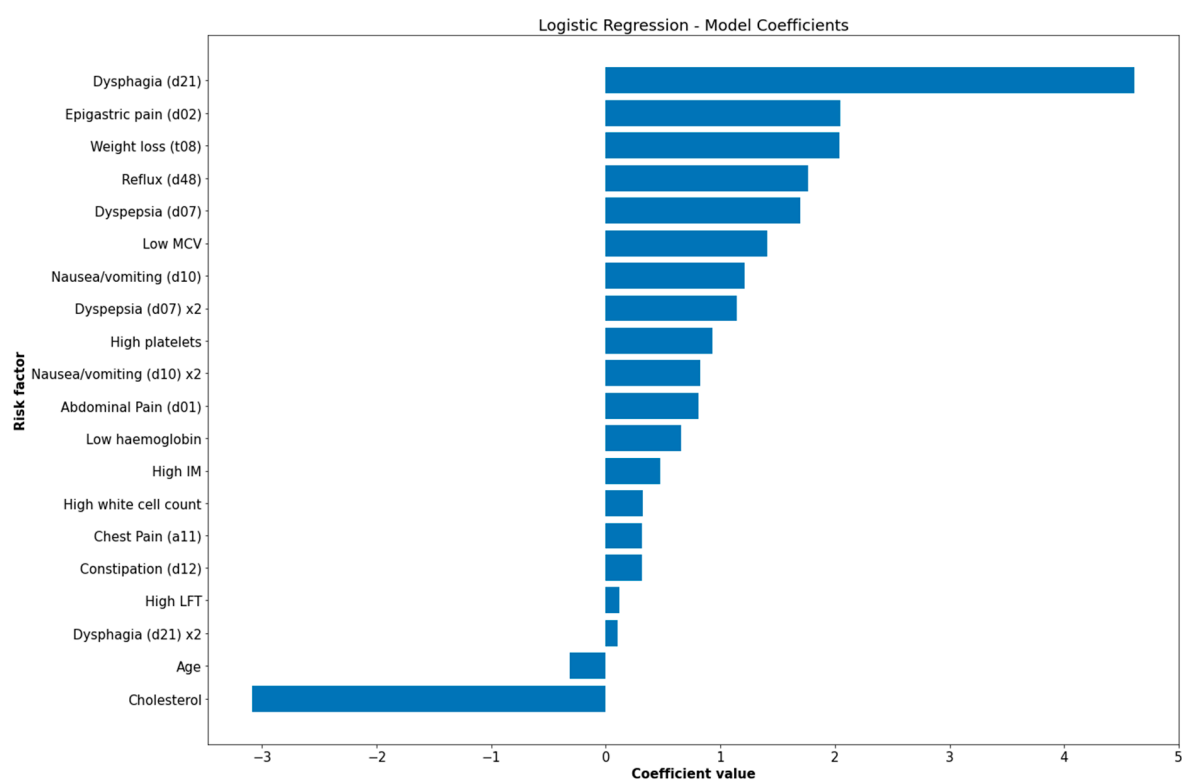

**Figure S3.** Feature contribution estimation for Logistic Regression. Feature contribution values approximated using model coefficients.

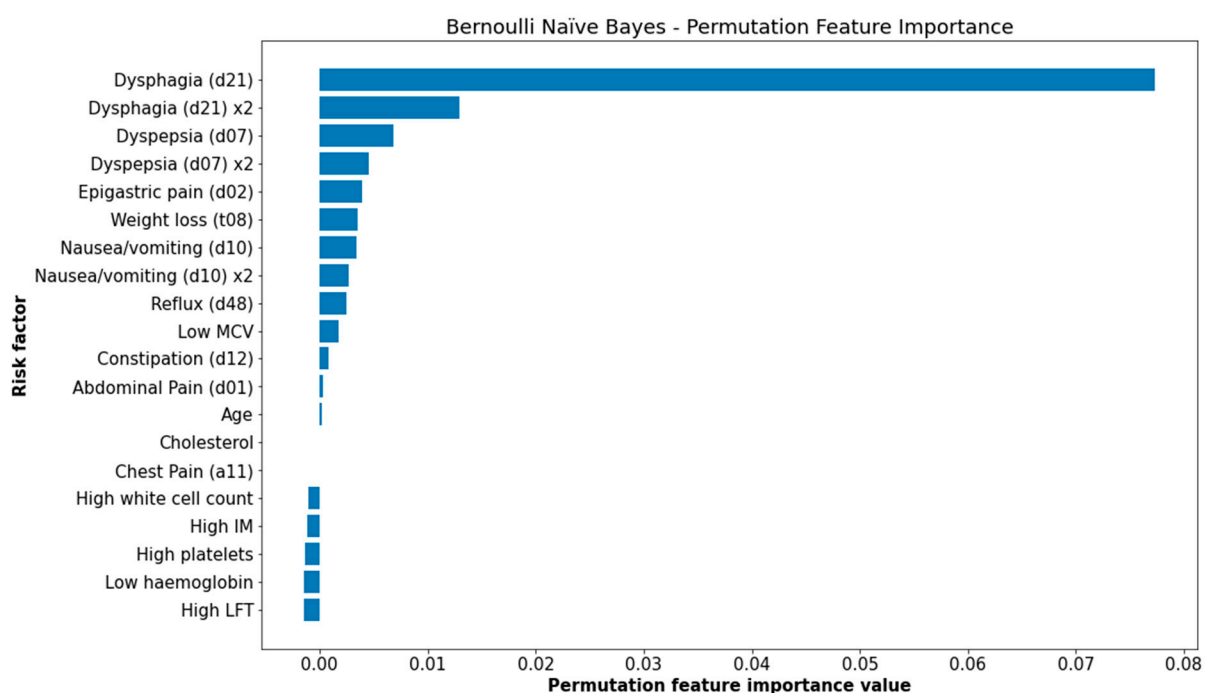

**Figure S4.** Feature contribution estimation for Naïve Bayes (Bernoulli). Feature contribution values determined using permutation feature importance (i.e., the mean relative decrease in the model accuracy score when a single feature value is randomly shuffled).

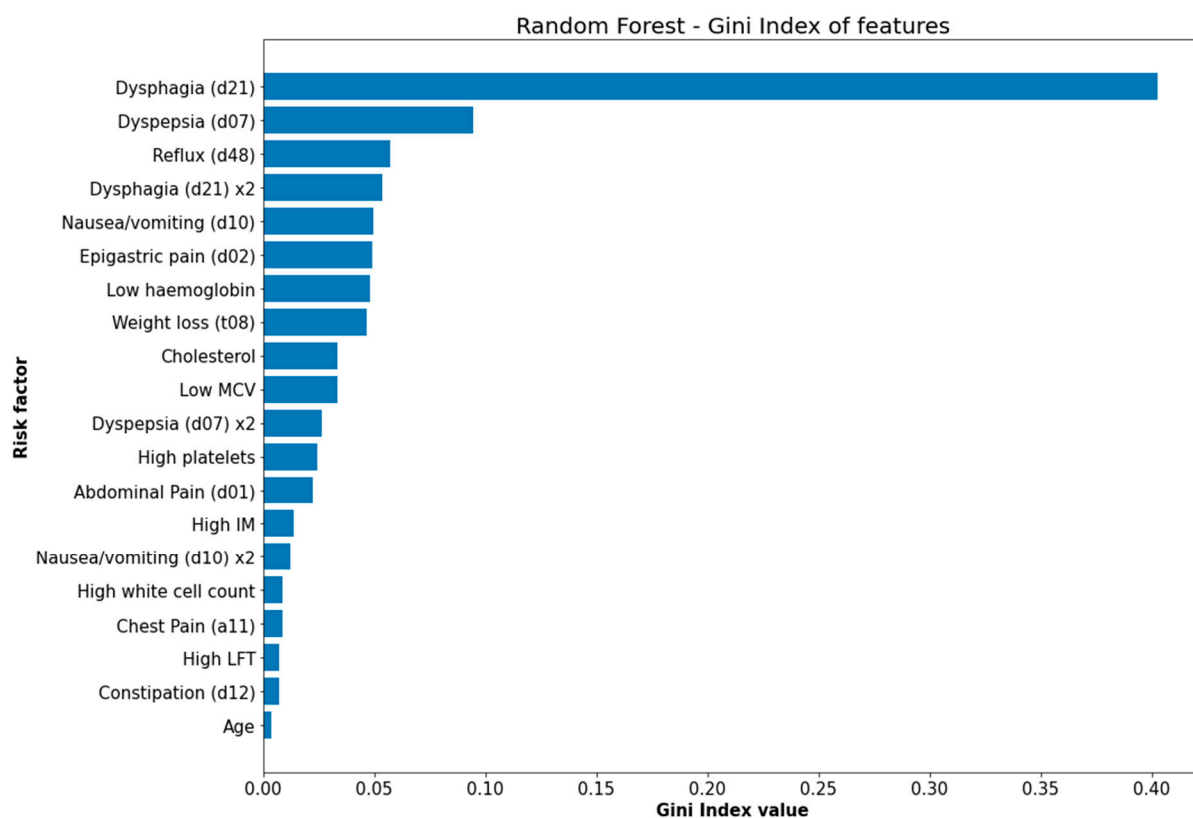

**Figure S5.** Feature contribution estimation for Random Forest. Feature contribution values correspond to mean decrease in impurity (Gini).

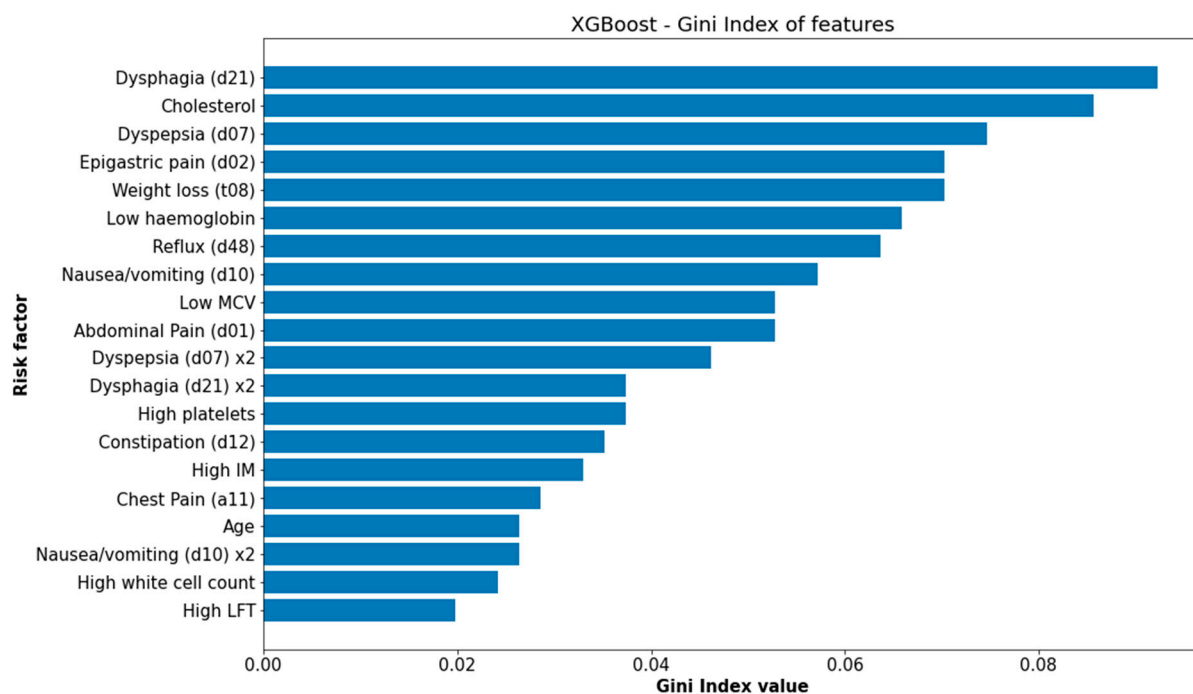

**Figure S6.** Feature contribution estimation for Extreme Gradient Boosted Decision Trees. Feature contribution values correspond to mean decrease in impurity (Gini).

**Table S4.** Model performances stratified across different patient groups according to demographics (sex, age group) and cancer site, demonstrated for a selection of some of the best-performing models (linear support vector machine and logistic regression) in comparison to the oesophago-gastric cancer Risk-Assessment Tool (ogRAT). N.B: Since the ogRAT only gives risk scores for over 55s, recall is 0 for the under 55 age group, and precision cannot be calculated.

| Model                                                                   | Variable           | Patient subgroup | Accuracy | Precision | Recall |
|-------------------------------------------------------------------------|--------------------|------------------|----------|-----------|--------|
| <b>Linear Support Vector Machine</b><br>(Classification threshold 0.55) | <b>Sex</b>         | Male             | 0.890    | 0.832     | 0.500  |
|                                                                         |                    | Female           | 0.900    | 0.813     | 0.549  |
|                                                                         | <b>Age Group</b>   | Under 55         | 0.882    | 0.889     | 0.559  |
|                                                                         |                    | 55 and over      | 0.894    | 0.819     | 0.514  |
|                                                                         | <b>Cancer Site</b> | Oesophageal      | 0.909    | 0.846     | 0.593  |
|                                                                         |                    | Gastric          | 0.864    | 0.771     | 0.384  |
| <b>Logistic Regression</b><br>(Classification threshold 0.425)          | <b>Sex</b>         | Male             | 0.893    | 0.786     | 0.568  |
|                                                                         |                    | Female           | 0.897    | 0.768     | 0.595  |
|                                                                         | <b>Age Group</b>   | Under 55         | 0.890    | 0.871     | 0.615  |
|                                                                         |                    | 55 and over      | 0.894    | 0.772     | 0.574  |
|                                                                         | <b>Cancer Site</b> | Oesophageal      | 0.908    | 0.796     | 0.646  |
|                                                                         |                    | Gastric          | 0.869    | 0.740     | 0.457  |
| <b>ogRAT</b><br>(Classification threshold 0.02)                         | <b>Sex</b>         | Male             | 0.868    | 0.895     | 0.312  |
|                                                                         |                    | Female           | 0.882    | 0.900     | 0.374  |
|                                                                         | <b>Age Group</b>   | Under 55         | 0.769    | N/A       | 0.0    |
|                                                                         |                    | 55 and over      | 0.879    | 0.897     | 0.362  |
|                                                                         | <b>Cancer Site</b> | Oesophageal      | 0.893    | 0.920     | 0.435  |
|                                                                         |                    | Gastric          | 0.835    | 0.797     | 0.155  |
| <b>ogRAT</b><br>(Classification threshold 0.01)                         | <b>Sex</b>         | Male             | 0.879    | 0.828     | 0.424  |
|                                                                         |                    | Female           | 0.892    | 0.834     | 0.488  |
|                                                                         | <b>Age Group</b>   | Under 55         | 0.769    | N/A       | 0.0    |
|                                                                         |                    | 55 and over      | 0.891    | 0.834     | 0.485  |
|                                                                         | <b>Cancer Site</b> | Oesophageal      | 0.900    | 0.850     | 0.526  |
|                                                                         |                    | Gastric          | 0.854    | 0.777     | 0.307  |

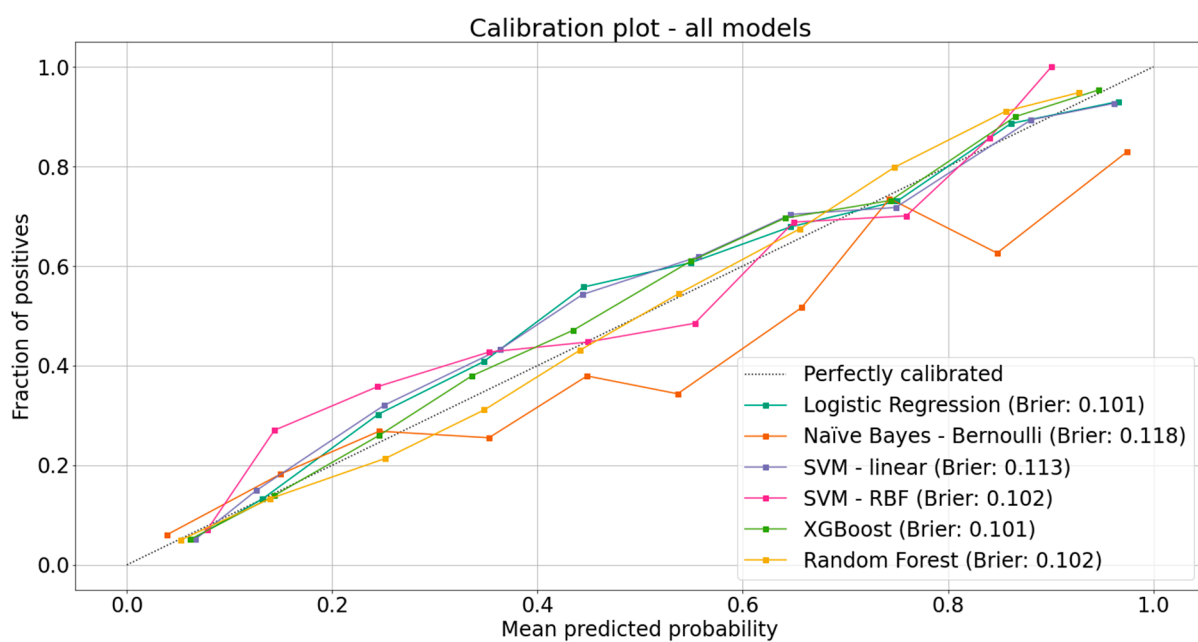

**Figure S7.** Calibration plot demonstrating the fraction of observed positives in the test dataset across the range of predicted probabilities, and the Brier score, for all models. SVM – Support Vector Machine. RBF – Radial Basis Function. XGBoost – eXtreme Gradient Boosted decision trees.



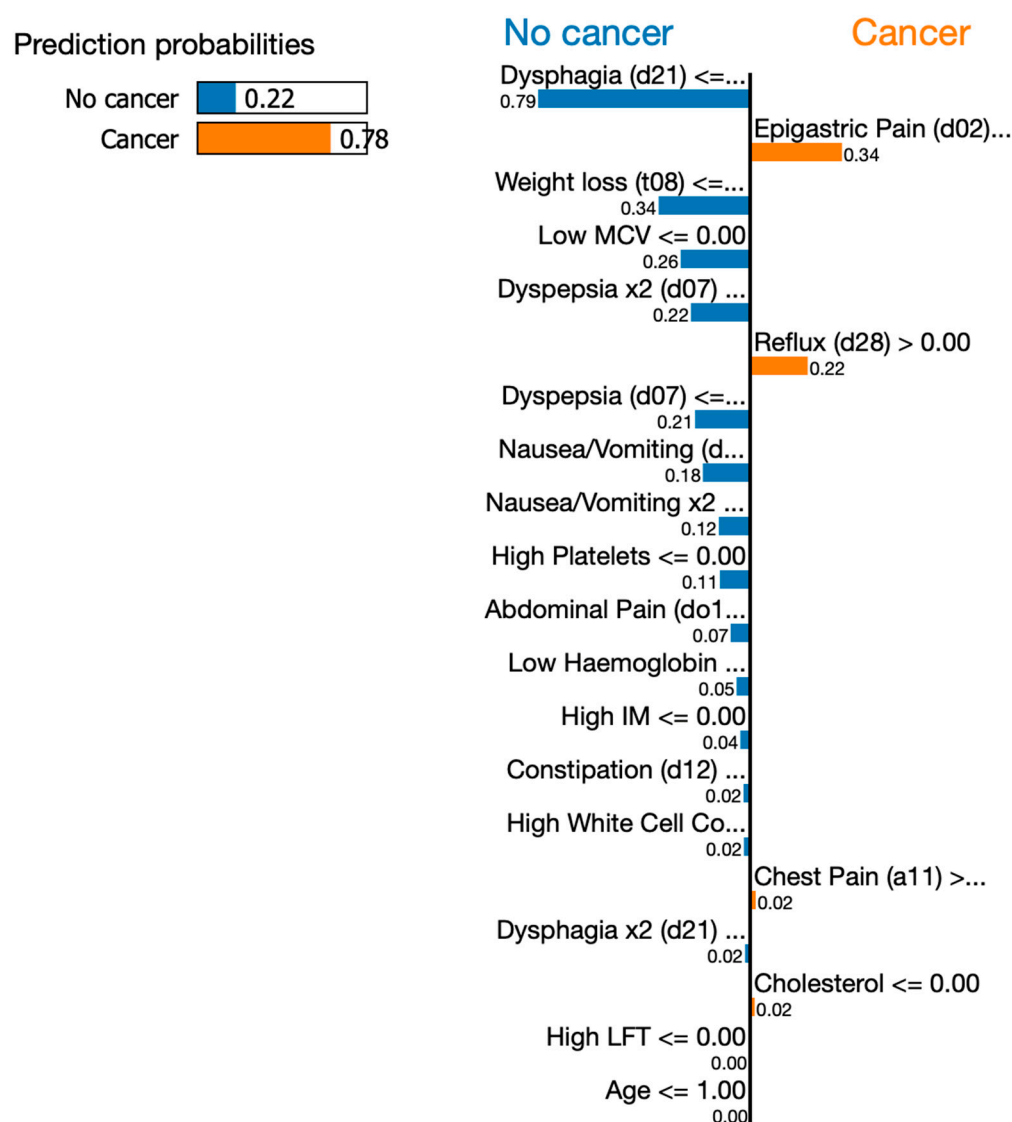

**Figure S8.** Example of an explanation for an individual prediction, demonstrating a cancer case with vaguer symptoms to which ML-based tools would assign a high risk score, whereas the current oesophago-gastric cancer Risk Assessment Tool (ogRAT) would not. Explanation generated using the Local Interpretable Model-Agnostic Explanations package [38]. Model: Linear Support Vector Machine.

## References

Ribeiro, M.T.; Singh, S.; Guestrin, C. ‘Why Should I Trust You?’: Explaining the Predictions of Any Classifier. In Proceedings of the 22nd ACM SIGKDD International Conference on Knowledge Discovery and Data Mining, San Francisco, CA, USA; ACM: 2016; pp. 1135–1144. Available online: <https://dl.acm.org/doi/10.1145/2939672.2939778> (accessed on 12 August 2021).
